# Supplementary material for: β-Substituted triarylborane appended porphyrins: photophysical properties and anion sensing
Source: Royal Society of Chemistry journal article supplement (doi:10.1039/c5ra03931b), 2015-01-01
Supplement: c5ra03931b1.pdf [file c5ra03931b1.pdf]

***β*-Substituted Triarylborane Appended Porphyrin: photophysical  
properties and anion sensing**

Department of Chemistry,  
Indian Institute of Technology Indore,  
Indore- 452 017, India.

[rajneeshmisra@iiti.ac.in](mailto:rajneeshmisra@iiti.ac.in)

**Table of Contents**

**I. Anion binding studies.....S2-S6**

**II. Copies of <sup>1</sup>H NMR, <sup>13</sup>C NMR and HRMS Spectra of the New Compounds.....S7**

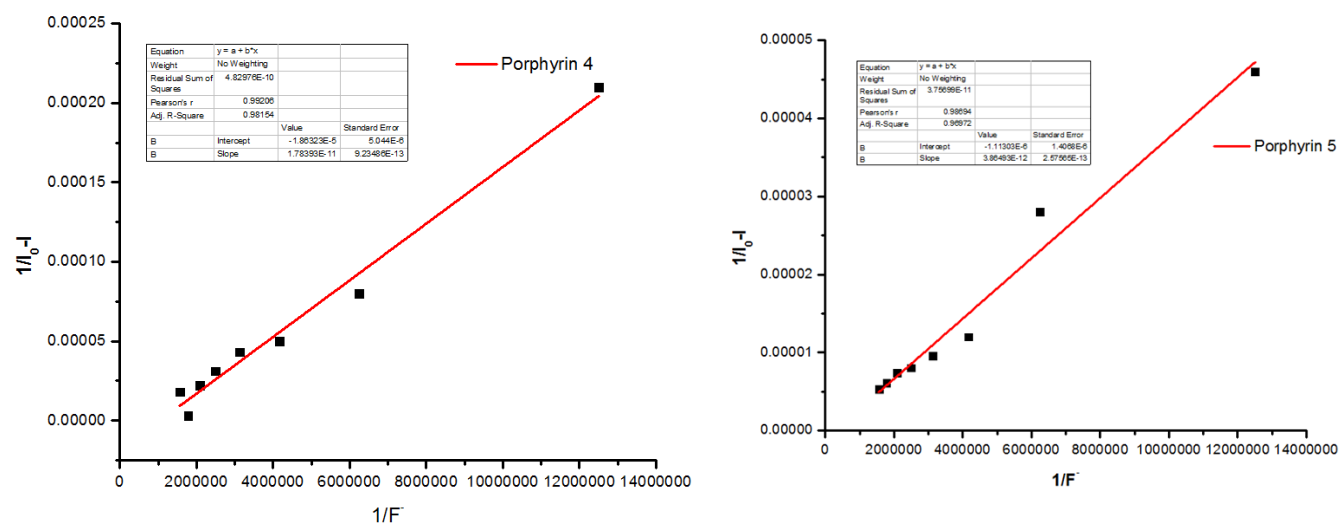

**Figure. S1.** Benesi–Hildebrand plot of porphyrin **4** and **5** by plotting  $1/(I_0-I)$  as a function of  $1/[F]$

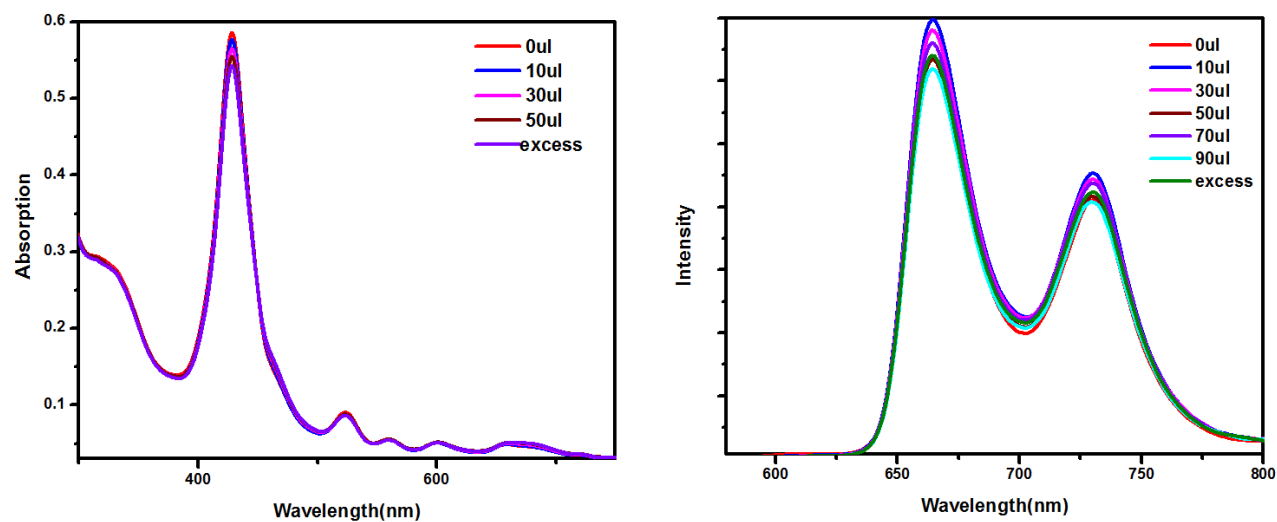

**Figure S2.** Absorption and Fluorescence titration spectra of triarylborane porphyrin **4** with TBACl in  $1.0 \times 10^{-6}$  M DCM solution at  $\lambda_{ex} = 428$  nm

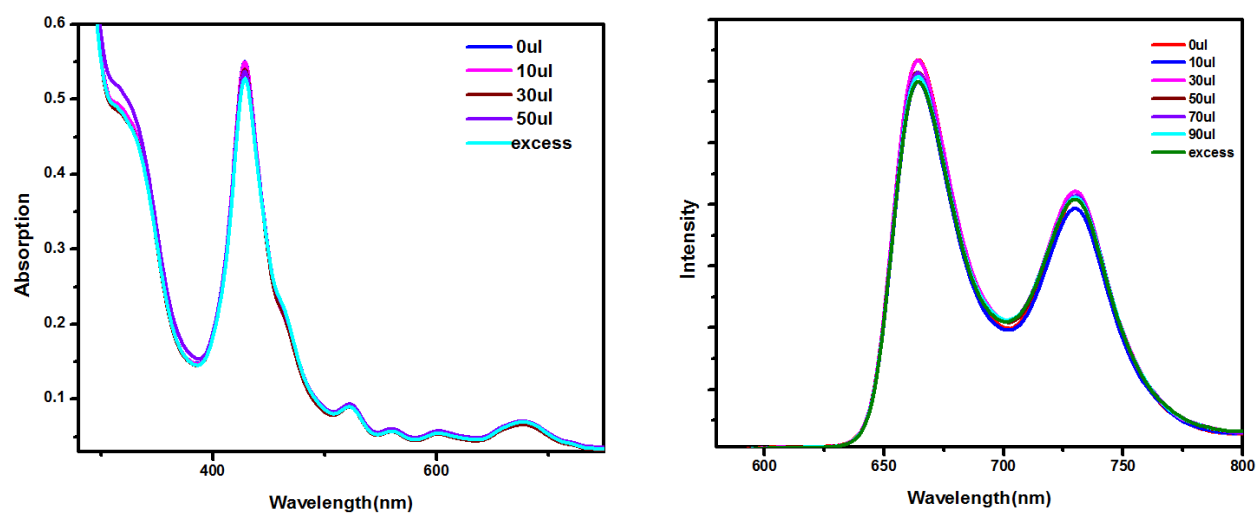

**Figure S3.** Absorption and Fluorescence titration spectra of triarylborane porphyrin **4** with TBABr in  $1.0 \times 10^{-6}$  M DCM solution at  $\lambda_{\text{ex}} = 428$  nm

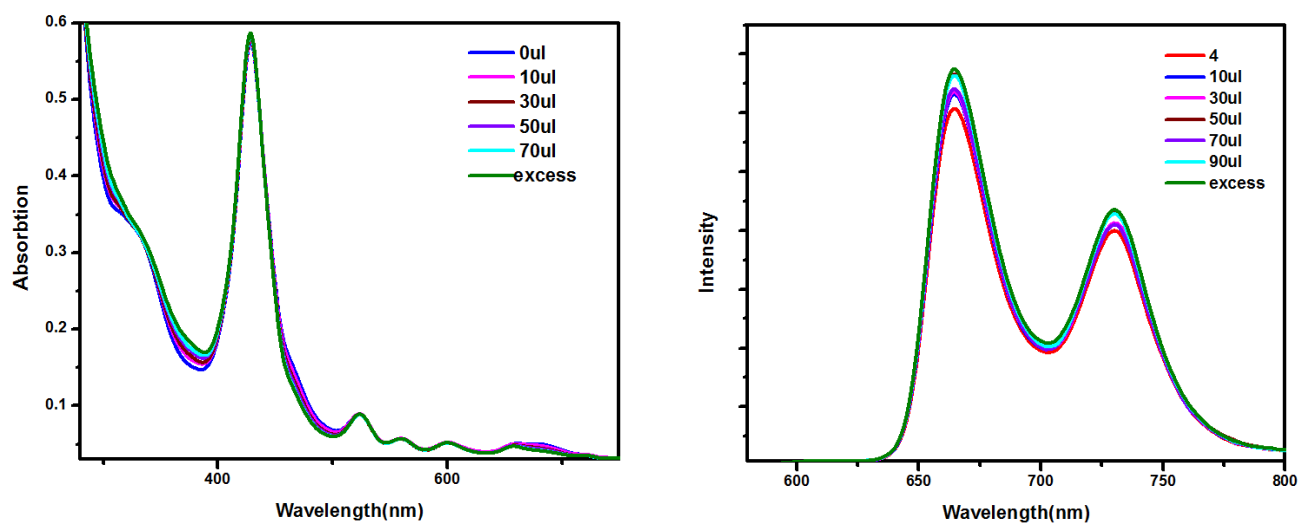

**Figure S4.** Absorption and Fluorescence titration spectra of triarylborane porphyrin **4** with TBAI in  $1.0 \times 10^{-6}$  M DCM solution at  $\lambda_{\text{ex}} = 428$  nm

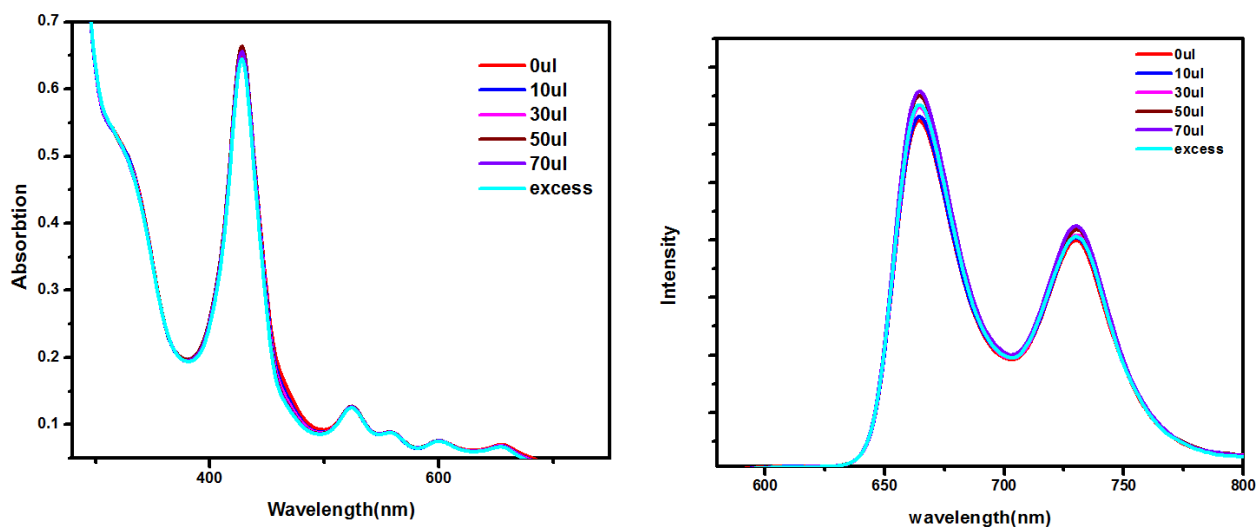

**Figure S5.** Absorption and Fluorescence titration spectra of triarylborane porphyrin **4** with TBACN in  $1.0 \times 10^{-6}$  M DCM solution at  $\lambda_{\text{ex}} = 428$  nm

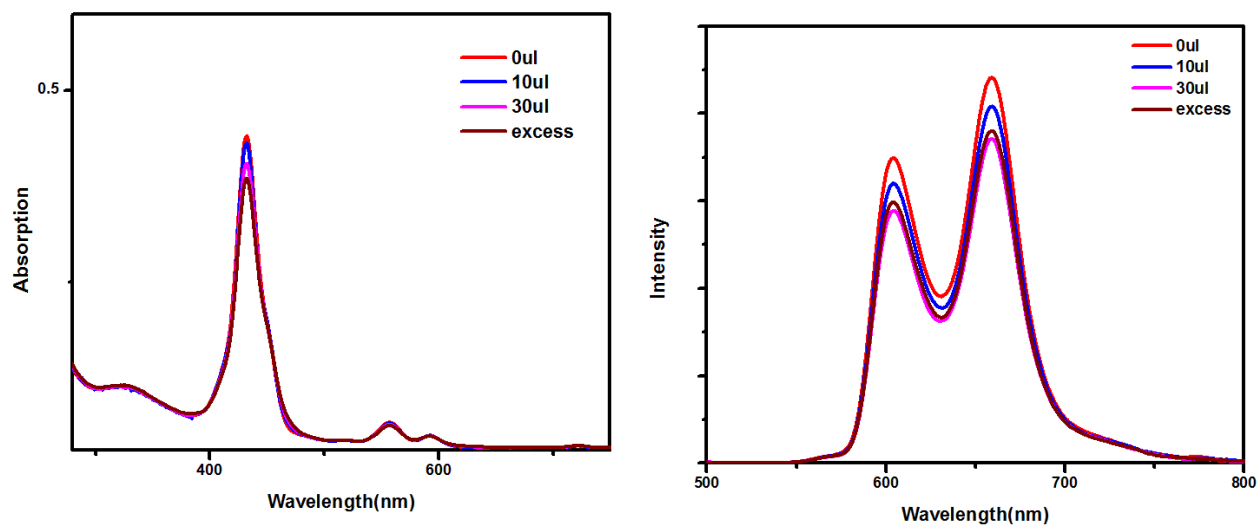

**Figure S6.** Absorption and Fluorescence titration spectra of metalated triarylborane porphyrin **5** with TBACl in  $1.0 \times 10^{-6}$  M DCM solution at  $\lambda_{\text{ex}} = 432$  nm

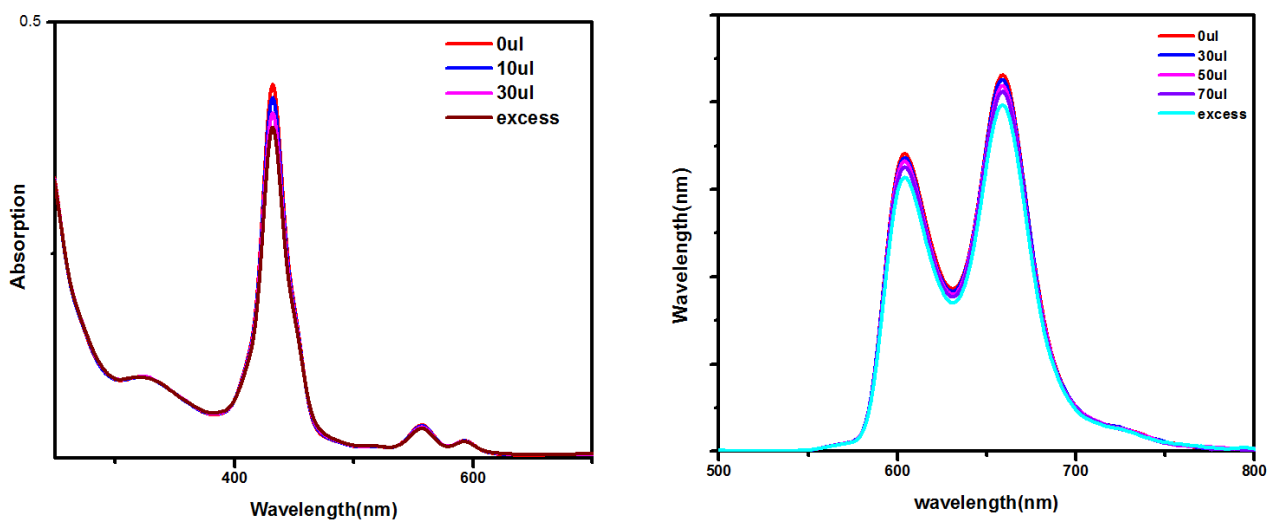

**Figure S7.** Absorption and Fluorescence titration spectra of metalated triarylborane porphyrin **5** with TBABr in  $1.0 \times 10^{-6}$  M DCM solution at  $\lambda_{\text{ex}} = 432$  nm

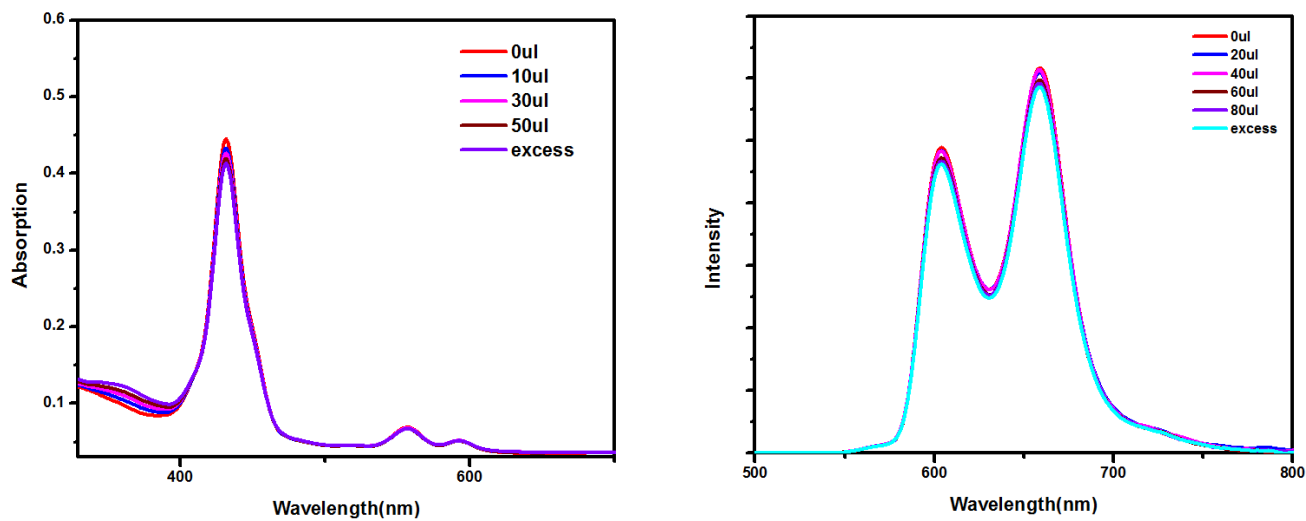

**Figure S8.** Absorption and Fluorescence titration spectra of metalated triarylborane porphyrin **5** with TBAI in  $1.0 \times 10^{-6}$  M DCM solution at  $\lambda_{\text{ex}} = 432$  nm

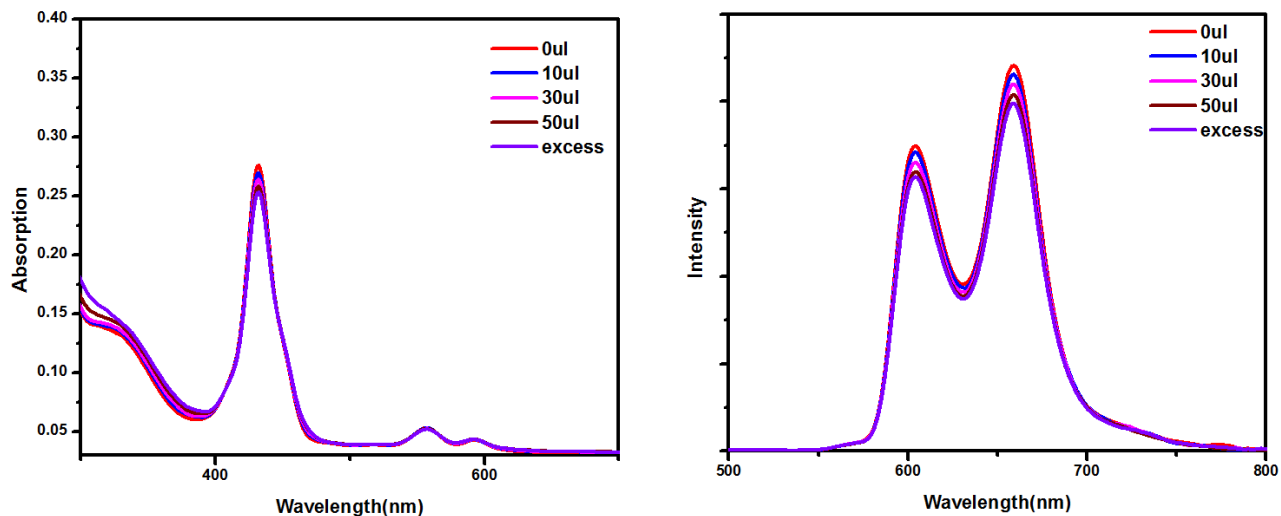

**Figure S9.** Absorption and Fluorescence titration

spectra of metalated triarylborane porphyrin **5** with TBACN in  $1.0 \times 10^{-6}$  M DCM solution at  $\lambda_{\text{ex}}$   
 $= 432$  nm

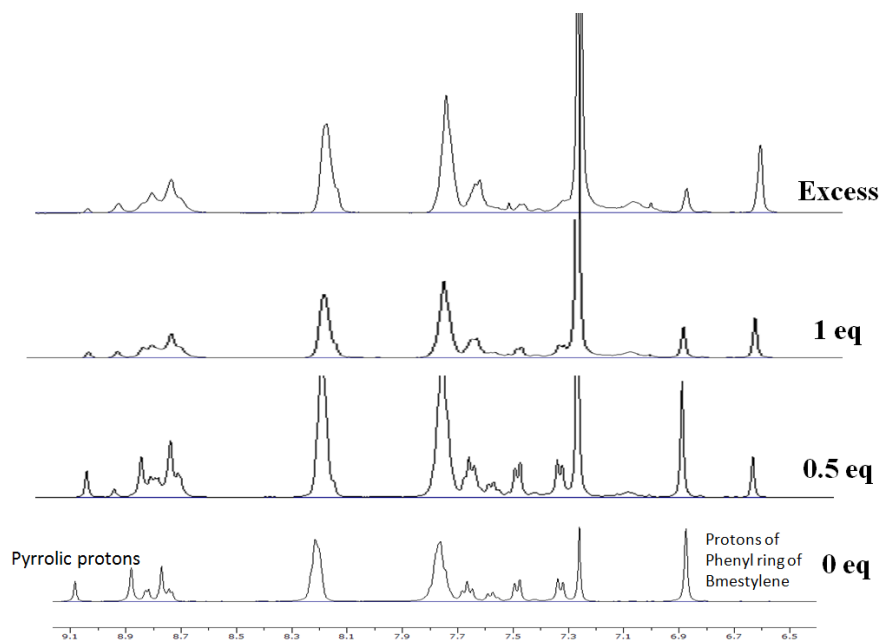

**Figure S10.**  $^1\text{H}$  NMR titration spectra of triarylborane porphyrin **4** in  $\text{CDCl}_3$

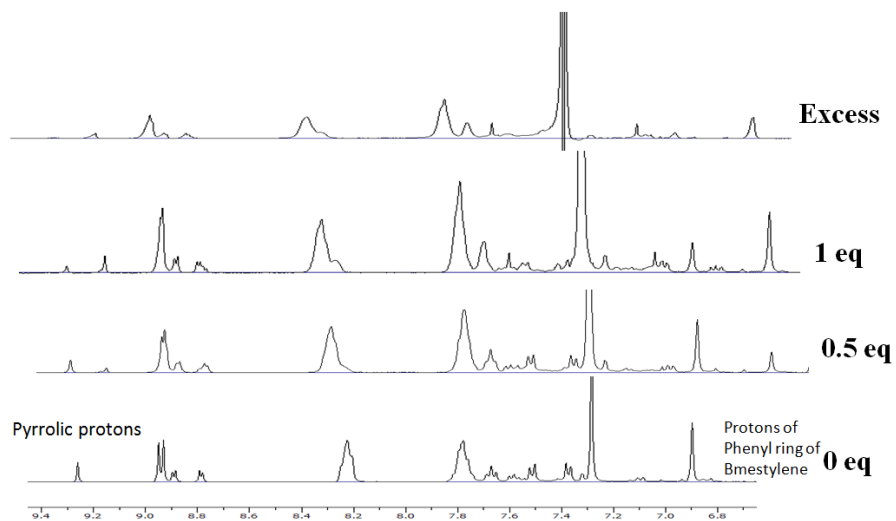

**Figure S11.**  $^1\text{H}$  NMR titration spectra of metalated triarylborane porphyrin **5** in  $\text{CDCl}_3$

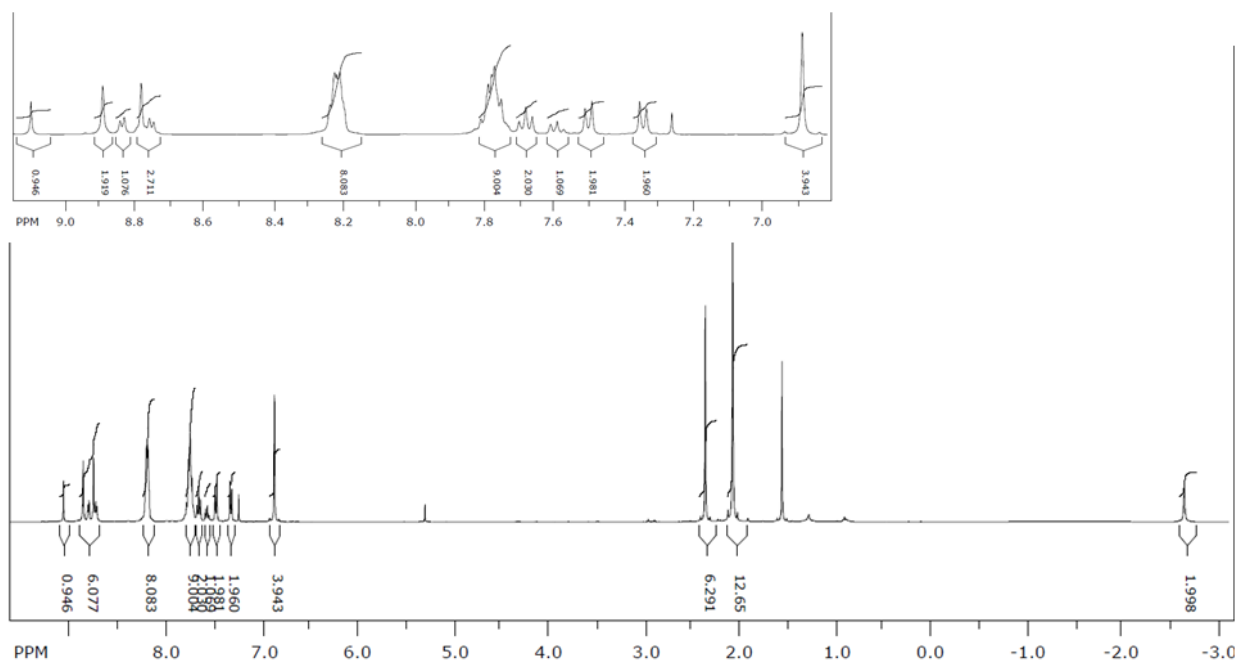

**Figure S12.  $^1\text{H}$  NMR Spectra of 4**

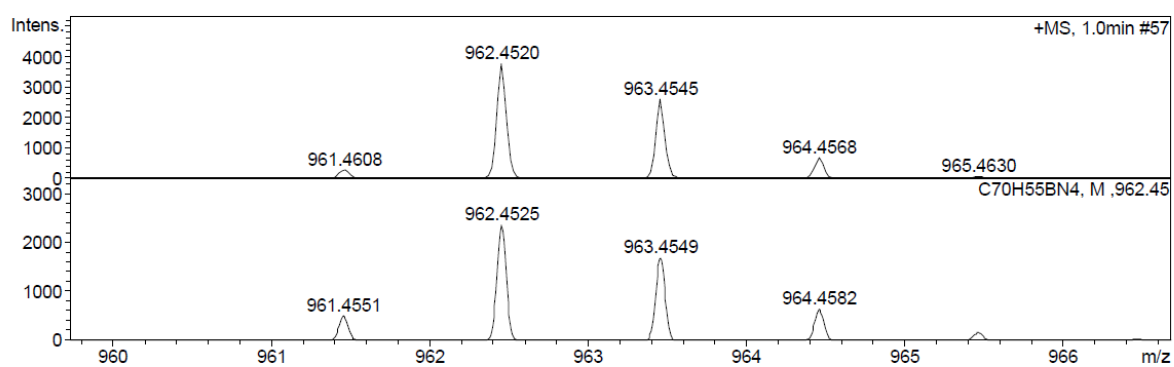

**Figure S13. HRMS mass spectrum of compound 4.**

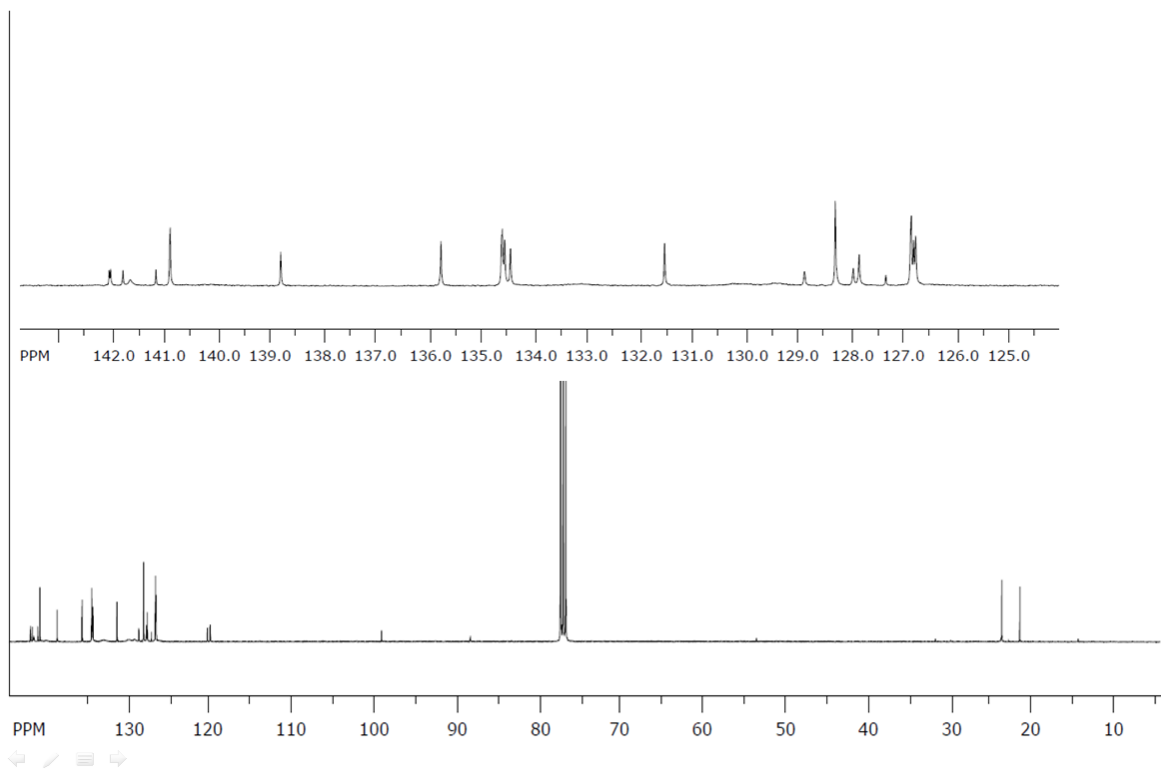

**Figure S14.  $^{13}\text{C}$  NMR Spectra of 4**

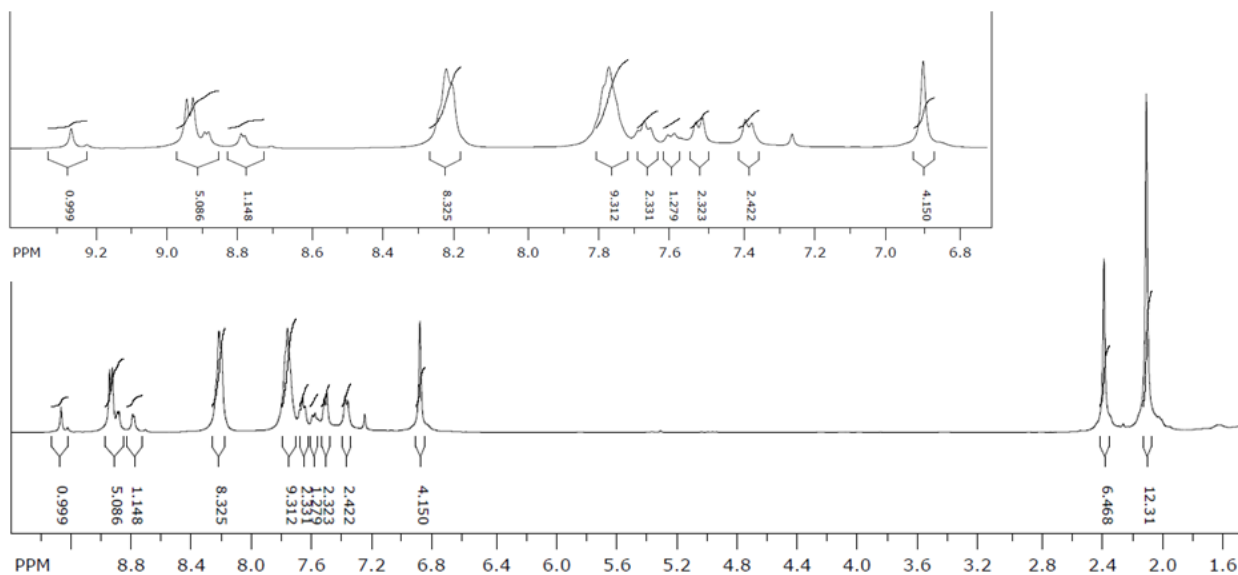

**Figure S15.  $^1\text{H}$  NMR Spectra of 5**

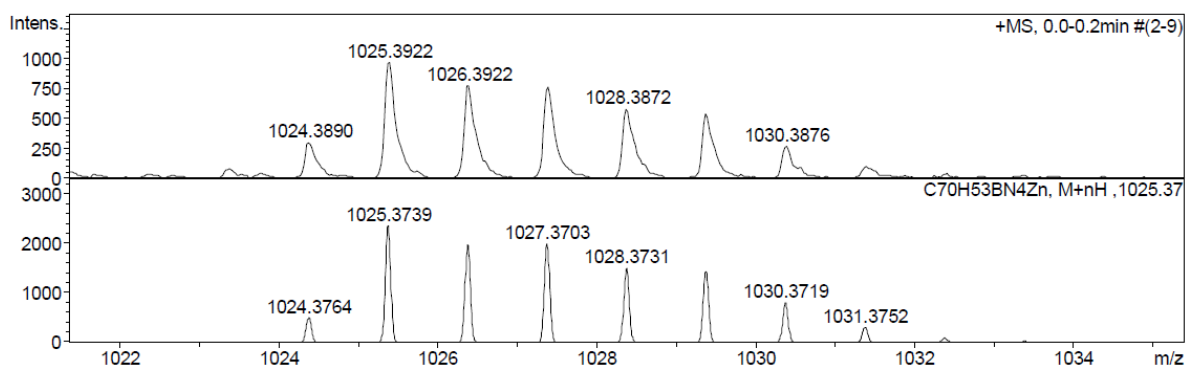

**Figure S16. HRMS mass spectrum of compound 5.**

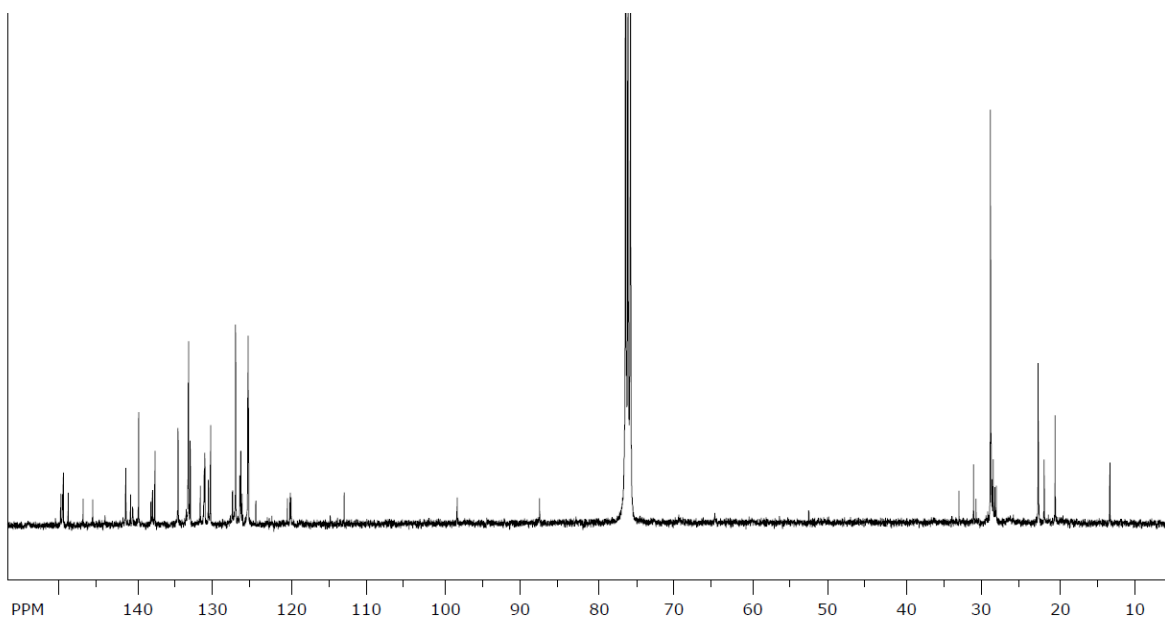

**Figure S17.  $^{13}\text{C}$  NMR Spectra of 5**
